# Supplementary material for: Oncolytic Maraba virus armed with tumor antigen boosts vaccine priming and reveals diverse therapeutic response patterns when combined with checkpoint blockade in ovarian cancer
Source: J Immunother Cancer. 2019 Jul 17;7:189. doi: 10.1186/s40425-019-0641-x (PMC6637574; doi:10.1186/s40425-019-0641-x)
Supplement: Supplementary file 7 — Table S1. Differentially Expressed Genes MIS416 Vax + MRB-OVA vs Untreated. (XLS 26 kb) [file 40425_2019_641_MOESM7_ESM.xls]

## Sheet: Sheet1
Supplemental Table 1
Differentially Expressed Genes MIS416 Vax + MRB-OVA vs Untreated
T cell Functions
Gene	Log2 fold change	P-value	FDR
Cd8a	4.31	1.045e-18	2.357e-15
Cd3e	3.2	7.66e-18	1.062e-14
Cd8b1	3.87	7.622e-17	4.3e-14
Cd274	4.77	1.286e-16	6.451e-14
Gzmk	4.71	2.409e-15	9.061e-13
Itgal	2.6	1.871e-14	4.223e-12
Tnfsf10	1.38	3.299e-14	6.474e-12
Spn	2.27	4.5e-14	8.124e-12
Fcgr4	4.04	6.516e-14	1.131e-11
Il2rb	2.88	7.795e-14	1.256e-11
Ccl5	4.31	1.421e-13	1.828e-11
Irf7	3.2	2.631e-13	2.969e-11
Cd40	1.98	4.436e-13	4.449e-11
H2.D1	2.47	1.387e-12	1.118e-10
Cd80	1.7	1.542e-12	1.14e-10
Cxcr3	1.82	1.562e-12	1.14e-10
Ptprc	2.33	1.663e-12	1.191e-10
Itgam	2.28	1.76e-12	1.241e-10
Ikzf1	1.73	1.847e-12	1.282e-10
Lcp1	1.69	2.136e-12	1.439e-10
Klrk1	2.54	2.576e-12	1.685e-10
Cd247	2.04	3.23e-12	2.025e-10
Ccr5	2.56	3.878e-12	2.398e-10
Cd3d	2.58	4.184e-12	2.552e-10
Icos	2.72	5.049e-12	2.999e-10
Itk	2.28	8.493e-12	4.675e-10
Lcn2	3.25	9.262e-12	5.036e-10
Ncf4	2.16	1.589e-11	8.241e-10
Cd86	1.72	1.827e-11	9.37e-10
Tgfb2	-2.18	3.099e-11	1.427e-09
Cd3g	2.87	4.065e-11	1.781e-09
H2.Ab1	2.34	4.278e-11	1.857e-09
Tbk1	0.914	7.34e-11	2.906e-09
Rorc	-0.858	8.15e-11	3.171e-09
Cd74	2.09	9.741e-11	3.726e-09
Ctla4	2.01	1.314e-10	4.941e-09
Cd27	2.43	1.509e-10	5.629e-09
Ccl7	2.27	1.613e-10	5.968e-09
Usp18	2.04	2.621e-10	9.032e-09
Isg20	2.55	3.14e-10	1.074e-08
Cxcl12	0.922	3.946e-10	1.319e-08
Ccl3	3.99	5.668e-10	1.814e-08
Socs1	1.96	6.8e-10	2.131e-08
Cma1	-2.24	7.35e-10	2.288e-08
Stat4	1.54	7.535e-10	2.329e-08
Il6ra	1.54	8.285e-10	2.544e-08
Cd5	1.98	8.672e-10	2.645e-08
Pdcd1	1.76	1.841e-09	5.359e-08
Tnfrsf1b	1.58	3.261e-09	9.114e-08
H2.M3	2.19	3.476e-09	9.611e-08
