# Supplementary material for: Oncolytic Maraba virus armed with tumor antigen boosts vaccine priming and reveals diverse therapeutic response patterns when combined with checkpoint blockade in ovarian cancer
Source: J Immunother Cancer. 2019 Jul 17;7:189. doi: 10.1186/s40425-019-0641-x (PMC6637574; doi:10.1186/s40425-019-0641-x)
Supplement: Supplementary file 8 — Table S2. Upregulated Immunosuppressive Genes: MIS416 Vax + MRB-OVA vs Untreated. (XLS 23 kb) [file 40425_2019_641_MOESM8_ESM.xls]

## Sheet: Sheet1
Supplemental Table 2
Upregulated Immunosuppressive Genes: MIS416 Vax + MRB-OVA vs Untreated
Gene	Log 2 Fold Change	P-Value	FDR
Cd274	4.77	1.29e-16	6.45e-14
Pdcd1lg2	1.57	4.62e-06	7.79e-05
Arg1	3.17	2.23e-08	5.36e-07
Arg2	3.15	3.5e-05	0.000531
Nos2	3.51	1.02e-07	2.24e-06
Ctla4	2.01	1.31e-10	4.94e-09
Lag3	1.97	7.13e-11	2.85e-09
Havcr2	3.23	6.52e-17	4.2e-14
Tigit	2.39	6.84e-11	2.76e-09
